# Supplementary material for: A co-formulation of interferons alpha2b and gamma distinctively targets cell cycle in the glioblastoma-derived cell line U-87MG
Source: BMC Cancer. 2023 Aug 29;23:806. doi: 10.1186/s12885-023-11330-2 (PMC10463508; doi:10.1186/s12885-023-11330-2)
Supplement: Supplementary file 3 — Supplementary Material 3 [file 12885_2023_11330_MOESM3_ESM.xlsx]

## Sheet: FigS1_ANOVA
Table Analyzed	HeberFERON
ANOVA summary
F	23.95
P value	0.0051
P value summary	**
Are differences among means statistically significant? (P < 0.05)	Yes
R square	0.9473
Brown-Forsythe test
F (DFn, DFd)	+infinity (3, 4)
P value	< 0.0001
P value summary	****
Significantly different standard deviations? (P < 0.05)	Yes
Bartlett's test
Bartlett's statistic (corrected)
P value
P value summary
Significantly different standard deviations? (P < 0.05)
ANOVA table	SS	DF	MS	F (DFn, DFd)	P value
Treatment (between columns)	34260000000000	3	11420000000000	F (3, 4) = 23.95	P = 0.0051
Residual (within columns)	1907000000000	4	476900000000
Total	36170000000000	7
Data summary
Number of treatments (columns)	4
Number of values (total)	8

## Sheet: FigS1_Tukey
Number of families	1
Number of comparisons per family	6
Alpha	0.05
Tukey's multiple comparisons test	Mean Diff.	95% CI of diff.	Significant?	Summary	Adjusted P Value
cc vs. IFN2b	340000	-2.471e+006 to 3.151e+006	No	ns	0.9567
cc vs. IFN	-680000	-3.491e+006 to 2.131e+006	No	ns	0.7661
cc vs. HeberFERON	4590000	1.779e+006 to 7.401e+006	Yes	**	0.0091
IFN2b vs. IFN	-1020000	-3.831e+006 to 1.791e+006	No	ns	0.5236
IFN2b vs. HeberFERON	4250000	1.439e+006 to 7.061e+006	Yes	*	0.0121
IFN vs. HeberFERON	5270000	2.459e+006 to 8.081e+006	Yes	**	0.0055
Test details	Mean 1	Mean 2	Mean Diff.	SE of diff.	n1	n2	q	DF
cc vs. IFN2b	9860000	9520000	340000	690543	2	2	0.6963	4
cc vs. IFN	9860000	10540000	-680000	690543	2	2	1.393	4
cc vs. HeberFERON	9860000	5270000	4590000	690543	2	2	9.4	4
IFN2b vs. IFN	9520000	10540000	-1020000	690543	2	2	2.089	4
IFN2b vs. HeberFERON	9520000	5270000	4250000	690543	2	2	8.704	4
IFN vs. HeberFERON	10540000	5270000	5270000	690543	2	2	10.79	4

## Sheet: Fig4_GlioVis
FOXM1
Tukey's Honest Significant Difference (HSD)
The table shows the difference between pairs, the 95% confidence interval and the p-value of the pairwise comparisons. ***p<0.001; **p<0.01; *p<0.05; ns, not significant.
Show the results in the plot
	diff	lwr	upr	p.adj	Significance
GBM-Oligoastrocytoma	2.39	1.9	2.88	0	***
GBM-Oligodendroglioma	2.37	1.92	2.82	0	***
GBM-Astrocytoma	2.04	1.59	2.48	0	***
Astrocytoma-Oligoastrocytoma	0.36	-0.11	0.82	0.2	ns
Astrocytoma-Oligodendroglioma	0.33	-0.08	0.75	0.17	ns
Oligoastrocytoma-Oligodendroglioma	-0.02	-0.49	0.44	1	ns
Pairwise t tests
Pairwise comparisons between group levels with corrections for multiple testing (p-values with Bonferroni correction).
	Oligodendroglioma	Oligoastrocytoma	Astrocytoma
Oligoastrocytoma	1	NA	NA
Astrocytoma	0.24	0.29	NA
GBM	5.5e-37	6.2e-32	1.5e-28

## Sheet: Fig5_Limma
FOXM1 Transcription factor network						AURKB Signaling						Phosphorylation of Emi1
gene_name	Padjag-a	Padjag-g	FCag-a	FCag-g		gene_name	Padjag-a	Padjag-g	FCag-a	FCag-g		gene_name	Padjag-a	Padjag-g	FCag-a	FCag-g
AURKB	1.7e-11	8.67e-05	-5.78123	-2.07145		AURKB	1.7e-11	8.67e-05	-5.78123	-2.07145		CCNB1	1.95e-14	2.3e-09	-4.73687	-2.41152
BIRC5	3.3e-11	2.77e-07	-3.02631	-2.04618		BIRC5	3.3e-11	2.77e-07	-3.02631	-2.04618		CDC20	5.68e-13	9.75e-08	-8.01719	-3.14595
BIRC5	3.69e-08	4.13e-06	-2.1359	-1.85258		BIRC5	3.69e-08	4.13e-06	-2.1359	-1.85258		FBXO5	1.62e-13	0.833118	-5.02223	-1.05665
CCNA2	2.33e-12	2.91e-05	-4.78806	-1.88337		CDCA8	1.27e-09	1.49e-05	-3.39845	-2.09981		PLK1	3.57e-10	2.12e-05	-3.61177	-2.0241
CCNB1	1.95e-14	2.3e-09	-4.73687	-2.41152		CENPA	4.5e-11	3.2e-07	-3.77017	-2.37707
CCNB2	7.28e-11	2.42e-09	-2.39352	-2.1723		CENPA	2.38e-08	1.98e-05	-2.36625	-1.83546
CENPA	4.5e-11	3.2e-07	-3.77017	-2.37707		INCENP	3.5e-10	0.0194888	-2.76794	-1.33468
CENPA	2.38e-08	1.98e-05	-2.36625	-1.83546		KIF20A	3.88e-14	3.03e-05	-6.07664	-1.79104
CENPF	2.62e-11	7.86e-08	-3.05237	-2.15982		KIF23	5.11e-07	0.316352	-1.58692	-1.11344
FOXM1	5.49e-10	8.11e-05	-2.62639	-1.63376		KIF23	3.56e-11	1.31e-05	-3.50085	-1.8699
FOXM1	1.46e-08	0.000959535	-2.14046	-1.45969		NCAPG	3.44e-13	1.22e-06	-3.93578	-1.86948
NEK2	4.59e-08	1.91e-07	-1.72277	-1.7284		STMN1	1.75e-10	0.000178125	-2.65801	-1.54672
NEK2	4.19e-11	5.5e-10	-2.73819	-2.56854		STMN1	5.21e-07	0.00545857	-2.00481	-1.43165
PLK1	3.57e-10	2.12e-05	-3.61177	-2.0241

## Sheet: Fig8_REST
qPCR results	CC vs IFN alfa				CC vs IFN ganma				CC vs HeberFERON				IFN alfa vs HeberFERON				IFN ganma vs HeberFERON
Ciclo celular
FOXM1	0.864	0,714 - 1,026	0.03	DOWN	0.725	0,596 - 0,856	0	DOWN	0.531	0,413 - 0,678	0	DOWN	0.615	0,479 - 0,822	0.001	DOWN	0.732	0,559 - 0,949	0.006	DOWN
PLK1	1.004	0,885 - 1,198	0.922		0.596	0,451 - 0,758	0	DOWN	0.28	0,199 - 0,380	0	DOWN	0.279	0,204 - 0,352	0	DOWN	0.471	0,329 - 0,667	0	DOWN
AURKB	1.446	1,230 - 1,813	0.001	UP	0.58	0,443 - 0,743	0.001	DOWN	0.301	0,225 - 0,397	0	DOWN	0.208	0,150 - 0,282	0	DOWN	0.518	0,373 - 0,728	0	DOWN
BIRC5	0.904	0,661 - 1,281	0.396		0.942	0,651 - 1,280	0.576		0.497	0,365 - 0,728	0	DOWN	0.55	0,427 - 0,753	0	DOWN	0.528	0,390 - 0,657	0	DOWN
CCNB1	1.089	0,954 - 1,228	0.069		1.154	1,048 - 1,265	0.002	UP	0.553	0,483 - 0,636	0	DOWN	0.508	0,428 - 0,600	0	DOWN	0.479	0,409 - 0,546	0	DOWN
CENPA	1.03	0,891 - 1,168	0.514		0.814	0,722 - 0,932	0	DOWN	0.445	0,351 - 0,551	0	DOWN	0.432	0,339 - 0,535	0	DOWN	0.547	0,424 - 0,693	0	DOWN
ASPM	1.185	0,936 - 1,541	0.045	UP	0.414	0,353 - 0,489	0	DOWN	0.274	0,205 - 0,354	0	DOWN	0.231	0,177 - 0,313	0	DOWN	0.662	0,494 - 0,874	0	DOWN
CDC20	0.985	0,711 - 1,355	0.895		0.445	0,357 - 0,546	0	DOWN	0.257	0,208 - 0,307	0	DOWN	0.261	0,203 - 0,378	0	DOWN	0.578	0,500 - 0,700	0	DOWN
BUB1	1.745	1,092 - 2,474	0.001	UP	1.165	0,737 - 1,675	0.252		0.941	0,538 - 1,695	0.76		0.539	0,327 - 0,812	0	DOWN	0.808	0,486 - 1,223	0.141
BUB1B	1.671	0,967 - 2,561	0.007	UP	0.709	0,415 - 1,143	0.046	DOWN	0.47	0,281 - 0,851	0.001	DOWN	0.281	0,189 - 0,424	0	DOWN	0.663	0,422 - 1,009	0.008	DOWN
CENPE	1.213	1,049 - 1,397	0.001	UP	0.899	0,780 - 1,036	0.055		0.557	0,478 - 0,656	0	DOWN	0.459	0,381 - 0,539	0	DOWN	0.62	0,522 - 0,752	0	DOWN
CENPF	0.994	0,824 - 1,293	0.939		0.899	0,802 - 0,997	0.013	DOWN	0.536	0,446 - 0,661	0	DOWN	0.54	0,393 - 0,688	0	DOWN	0.596	0,510 - 0,746	0	DOWN
ZWINT	1.058	0,920 - 1,213	0.207		0.589	0,471 - 0,734	0	DOWN	0.389	0,277 - 0,505	0	DOWN	0.367	0,266 - 0,453	0	DOWN	0.66	0,454 - 0,915	0.002	DOWN

## Sheet: FigS2_GlioVis
GlioVis - Visualization Tools for Glioma Datasets (cnio.es)
AURKB
Tukey's Honest Significant Difference (HSD)
The table shows the difference between pairs, the 95% confidence interval and the p-value of the pairwise comparisons. ***p<0.001; **p<0.01; *p<0.05; ns, not significant.
Show the results in the plot
	diff	lwr	upr	p.adj	Significance
GBM-Oligodendroglioma	3.52	2.96	4.09	0	***
GBM-Oligoastrocytoma	3.18	2.56	3.81	0	***
GBM-Astrocytoma	2.7	2.13	3.26	0	***
Astrocytoma-Oligodendroglioma	0.83	0.29	1.36	0	***
Astrocytoma-Oligoastrocytoma	0.49	-0.1	1.08	0.15	ns
Oligoastrocytoma-Oligodendroglioma	0.34	-0.25	0.93	0.46	ns
Pairwise t tests
Pairwise comparisons between group levels with corrections for multiple testing (p-values with Bonferroni correction).
	Oligodendroglioma	Oligoastrocytoma	Astrocytoma
Oligoastrocytoma	0.85	NA	NA
Astrocytoma	0.00043	0.21	NA
GBM	3.4e-48	1.6e-34	1.2e-30
BIRC5
Tukey's Honest Significant Difference (HSD)
The table shows the difference between pairs, the 95% confidence interval and the p-value of the pairwise comparisons. ***p<0.001; **p<0.01; *p<0.05; ns, not significant.
Show the results in the plot
	diff	lwr	upr	p.adj	Significance
GBM-Oligodendroglioma	3.64	3.1	4.17	0	***
GBM-Oligoastrocytoma	3.38	2.79	3.97	0	***
GBM-Astrocytoma	3.07	2.54	3.6	0	***
Astrocytoma-Oligodendroglioma	0.57	0.06	1.07	0.02	*
Astrocytoma-Oligoastrocytoma	0.31	-0.25	0.87	0.47	ns
Oligoastrocytoma-Oligodendroglioma	0.25	-0.31	0.81	0.65	ns
Pairwise t tests
Pairwise comparisons between group levels with corrections for multiple testing (p-values with Bonferroni correction).
	Oligodendroglioma	Oligoastrocytoma	Astrocytoma
Oligoastrocytoma	1	NA	NA
Astrocytoma	0.023	0.9	NA
GBM	8.9e-56	3.1e-42	2.7e-42
CCNB2
Tukey's Honest Significant Difference (HSD)
The table shows the difference between pairs, the 95% confidence interval and the p-value of the pairwise comparisons. ***p<0.001; **p<0.01; *p<0.05; ns, not significant.
Show the results in the plot
	diff	lwr	upr	p.adj	Significance
GBM-Oligodendroglioma	3.55	3.03	4.08	0	***
GBM-Oligoastrocytoma	3.36	2.78	3.94	0	***
GBM-Astrocytoma	2.9	2.38	3.43	0	***
Astrocytoma-Oligodendroglioma	0.65	0.15	1.14	0	**
Astrocytoma-Oligoastrocytoma	0.45	-0.1	1	0.15	ns
Oligoastrocytoma-Oligodendroglioma	0.2	-0.35	0.75	0.79	ns
Pairwise t tests
Pairwise comparisons between group levels with corrections for multiple testing (p-values with Bonferroni correction).
	Oligodendroglioma	Oligoastrocytoma	Astrocytoma
Oligoastrocytoma	1	NA	NA
Astrocytoma	0.0046	0.21	NA
GBM	4.7e-55	9.4e-43	1.8e-39
CCNB1
Tukey's Honest Significant Difference (HSD)
The table shows the difference between pairs, the 95% confidence interval and the p-value of the pairwise comparisons. ***p<0.001; **p<0.01; *p<0.05; ns, not significant.
Show the results in the plot
	diff	lwr	upr	p.adj	Significance
GBM-Oligodendroglioma	2.58	2.3	2.86	0	***
GBM-Oligoastrocytoma	2.55	2.24	2.86	0	***
GBM-Astrocytoma	2.25	1.97	2.52	0	***
Astrocytoma-Oligodendroglioma	0.33	0.07	0.6	0.01	**
Astrocytoma-Oligoastrocytoma	0.31	0.01	0.6	0.04	*
Oligoastrocytoma-Oligodendroglioma	0.03	-0.26	0.32	0.99	ns
Pairwise t tests
Pairwise comparisons between group levels with corrections for multiple testing (p-values with Bonferroni correction).
	Oligodendroglioma	Oligoastrocytoma	Astrocytoma
Oligoastrocytoma	1	NA	NA
Astrocytoma	0.0066	0.044	NA
GBM	1.3e-89	2.1e-76	5.4e-73
PLK1
Tukey's Honest Significant Difference (HSD)
The table shows the difference between pairs, the 95% confidence interval and the p-value of the pairwise comparisons. ***p<0.001; **p<0.01; *p<0.05; ns, not significant.
Show the results in the plot
	diff	lwr	upr	p.adj	Significance
GBM-Oligodendroglioma	2.3	1.98	2.62	0	***
GBM-Oligoastrocytoma	2.05	1.7	2.4	0	***
GBM-Astrocytoma	1.86	1.55	2.18	0	***
Astrocytoma-Oligodendroglioma	0.44	0.14	0.73	0	***
Oligoastrocytoma-Oligodendroglioma	0.25	-0.09	0.58	0.23	ns
Astrocytoma-Oligoastrocytoma	0.19	-0.14	0.52	0.45	ns
Pairwise t tests
Pairwise comparisons between group levels with corrections for multiple testing (p-values with Bonferroni correction).
	Oligodendroglioma	Oligoastrocytoma	Astrocytoma
Oligoastrocytoma	0.34	NA	NA
Astrocytoma	0.001	0.82	NA
GBM	5.4e-62	4.9e-44	4.7e-44
CENPF
Tukey's Honest Significant Difference (HSD)
The table shows the difference between pairs, the 95% confidence interval and the p-value of the pairwise comparisons. ***p<0.001; **p<0.01; *p<0.05; ns, not significant.
Show the results in the plot
	diff	lwr	upr	p.adj	Significance
GBM-Oligodendroglioma	1.93	1.48	2.38	0	***
GBM-Oligoastrocytoma	1.75	1.26	2.25	0	***
GBM-Astrocytoma	1.33	0.88	1.78	0	***
Astrocytoma-Oligodendroglioma	0.6	0.17	1.02	0	**
Astrocytoma-Oligoastrocytoma	0.42	-0.05	0.89	0.1	ns
Oligoastrocytoma-Oligodendroglioma	0.18	-0.29	0.65	0.77	ns
Pairwise t tests
Pairwise comparisons between group levels with corrections for multiple testing (p-values with Bonferroni correction).
	Oligodendroglioma	Oligoastrocytoma	Astrocytoma
Oligoastrocytoma	1	NA	NA
Astrocytoma	0.0018	0.13	NA
GBM	2.9e-25	6.1e-18	4.7e-13
CENPA
Tukey's Honest Significant Difference (HSD)
The table shows the difference between pairs, the 95% confidence interval and the p-value of the pairwise comparisons. ***p<0.001; **p<0.01; *p<0.05; ns, not significant.
Show the results in the plot
	diff	lwr	upr	p.adj	Significance
GBM-Oligodendroglioma	3.7	3.24	4.16	0	***
GBM-Oligoastrocytoma	3.41	2.91	3.92	0	***
GBM-Astrocytoma	2.87	2.41	3.32	0	***
Astrocytoma-Oligodendroglioma	0.83	0.4	1.26	0	***
Astrocytoma-Oligoastrocytoma	0.55	0.07	1.02	0.02	*
Oligoastrocytoma-Oligodendroglioma	0.29	-0.19	0.77	0.41	ns
Pairwise t tests
Pairwise comparisons between group levels with corrections for multiple testing (p-values with Bonferroni correction).
	Oligodendroglioma	Oligoastrocytoma	Astrocytoma
Oligoastrocytoma	0.75	NA	NA
Astrocytoma	4.4e-06	0.02	NA
GBM	1.2e-73	9.6e-56	4.2e-49
NEK2
Tukey's Honest Significant Difference (HSD)
The table shows the difference between pairs, the 95% confidence interval and the p-value of the pairwise comparisons. ***p<0.001; **p<0.01; *p<0.05; ns, not significant.
Show the results in the plot
	diff	lwr	upr	p.adj	Significance
GBM-Oligodendroglioma	2.98	2.49	3.46	0	***
GBM-Oligoastrocytoma	2.97	2.44	3.5	0	***
GBM-Astrocytoma	2.67	2.19	3.15	0	***
Astrocytoma-Oligodendroglioma	0.3	-0.15	0.75	0.32	ns
Astrocytoma-Oligoastrocytoma	0.29	-0.21	0.8	0.44	ns
Oligoastrocytoma-Oligodendroglioma	0.01	-0.5	0.51	1	ns
Pairwise t tests
Pairwise comparisons between group levels with corrections for multiple testing (p-values with Bonferroni correction).
	Oligodendroglioma	Oligoastrocytoma	Astrocytoma
Oligoastrocytoma	1	NA	NA
Astrocytoma	0.52	0.8	NA
GBM	1.3e-47	2.1e-40	5.6e-40
CDC20
Tukey's Honest Significant Difference (HSD)
The table shows the difference between pairs, the 95% confidence interval and the p-value of the pairwise comparisons. ***p<0.001; **p<0.01; *p<0.05; ns, not significant.
Show the results in the plot
	diff	lwr	upr	p.adj	Significance
GBM-Oligodendroglioma	3.63	3.18	4.09	0	***
GBM-Oligoastrocytoma	3.13	2.63	3.63	0	***
GBM-Astrocytoma	2.58	2.12	3.03	0	***
Astrocytoma-Oligodendroglioma	1.06	0.63	1.48	0	***
Astrocytoma-Oligoastrocytoma	0.55	0.08	1.03	0.01	*
Oligoastrocytoma-Oligodendroglioma	0.5	0.03	0.98	0.03	*
Pairwise t tests
Pairwise comparisons between group levels with corrections for multiple testing (p-values with Bonferroni correction).
	Oligodendroglioma	Oligoastrocytoma	Astrocytoma
Oligoastrocytoma	0.039	NA	NA
Astrocytoma	1.9e-09	0.016	NA
GBM	1.8e-72	6.4e-49	1.5e-41
